# Supplementary material for: Effect of Extracts, Fractions, and Isolated Molecules of Casearia sylvestris to Control Streptococcus mutans Cariogenic Biofilm
Source: MDPI journal article supplement (doi:10.3390/antibiotics12020329), 2023-02-04
Supplement: s1 [file s1]

# Effect of Extracts, Fractions, and Isolated Molecules of *Casearia sylvestris* to Control *Streptococcus mutans* Cariogenic Biofilm

Sabrina M. Ribeiro. Paula C. P. Bueno. Alberto José Cavalleiro. Marlise I. Klein

## Supplementary Materials

**Table S1.** Activity against initial biofilm formation (24 h) of fractions of *C. sylvestris* against *S. mutans*

|                                    | ARA<br><i>lingua</i><br>leaves<br>(Hex) | ARA<br><i>lingua</i> -<br>leaves<br>(AcOEt) | ARA<br><i>lingua</i><br>leaves<br>(EtOH) | ARA<br><i>lingua</i> fruit<br>s (Hex) | ARA<br><i>sylvestris</i><br>leaves<br>(Hex) | ARA<br><i>sylvestris</i><br>leaves<br>(EtOH) | ARA<br>intermedia<br>te leaves<br>(EtOH) | BRA<br><i>lingua</i><br>leaves<br>(Hex) | V                      | Sm                     |
|------------------------------------|-----------------------------------------|---------------------------------------------|------------------------------------------|---------------------------------------|---------------------------------------------|----------------------------------------------|------------------------------------------|-----------------------------------------|------------------------|------------------------|
| <b>Log<sub>10</sub><br/>CFU/mL</b> | 7.29                                    | 6.93                                        | 7.02                                     | 7.11                                  | 7.18                                        | 7.15                                         | 7.38                                     | 7.15                                    | 7.41                   | 7.03                   |
|                                    | 7.26                                    | 7                                           | 6.99                                     | 7.15                                  | 7.15                                        | 7.1                                          | 7.27                                     | 7.19                                    | 7.49                   | 7.1                    |
|                                    | 7.19                                    | 5.7                                         | 7.05                                     | 6.95                                  | 7.07                                        | 7.15                                         | 7.22                                     | 7.14                                    | 7.43                   | 7.21                   |
|                                    | 7.21                                    | 5.6                                         | 7.11                                     | 7                                     | 7.02                                        | 7.19                                         | 7.21                                     | 7.07                                    | 7.41                   | 7.14                   |
|                                    | -                                       | 7.07                                        | 7.02                                     | 7.09                                  | -                                           | 7.23                                         | 7.26                                     | 7.26                                    | 7.71                   | 7.15                   |
|                                    | -                                       | 7.11                                        | 7.05                                     | 7.13                                  | -                                           | 7.24                                         | 7.22                                     | 7.25                                    | 7.79                   | 7.14                   |
| <b>Mean</b>                        | 7.24                                    | 6.57                                        | 7.04                                     | 7.07                                  | 7.1                                         | 7.17                                         | 7.26                                     | 7.18                                    | 7.21                   | 7.15                   |
| <b>SD</b>                          | 0.04                                    | 0.71                                        | 0.04                                     | 0.08                                  | 0.07                                        | 0.05                                         | 0.06                                     | 0.07                                    | 0.05                   | 0.05                   |
| <b>%CV</b>                         | 0.62                                    | 10.87                                       | 0.61                                     | 1.11                                  | 0.99                                        | 0.74                                         | 0.86                                     | 1.01                                    | 0.76                   | 0.75                   |
| <b>CFU/mL</b>                      | 1.94 x 10 <sup>7</sup>                  | 8.50 x 10 <sup>6</sup>                      | 1.05 x 10 <sup>7</sup>                   | 1.30 x 10 <sup>7</sup>                | 1.50E x 10 <sup>7</sup>                     | 1.42 x 10 <sup>7</sup>                       | 2.39 x 10 <sup>7</sup>                   | 1.41 x 10 <sup>7</sup>                  | 2.60 x 10 <sup>7</sup> | 1.08 x 10 <sup>7</sup> |
|                                    | 1.80 x 10 <sup>7</sup>                  | 1.00 x 10 <sup>7</sup>                      | 9.70 x 10 <sup>6</sup>                   | 1.40 x 10 <sup>7</sup>                | 1.40 x 10 <sup>7</sup>                      | 1.25 x 10 <sup>7</sup>                       | 1.86 x 10 <sup>7</sup>                   | 1.54 x 10 <sup>7</sup>                  | 3.10 x 10 <sup>7</sup> | 1.25 x 10 <sup>7</sup> |
|                                    | 1.54 x 10 <sup>7</sup>                  | 5.00 x 10 <sup>5</sup>                      | 1.12 x 10 <sup>7</sup>                   | 9.00 x 10 <sup>6</sup>                | 1.18 x 10 <sup>7</sup>                      | 1.40 x 10 <sup>7</sup>                       | 1.65 x 10 <sup>7</sup>                   | 1.37 x 10 <sup>7</sup>                  | 2.70 x 10 <sup>7</sup> | 1.62 x 10 <sup>7</sup> |
|                                    | 1.63 x 10 <sup>7</sup>                  | 4.00 x 10 <sup>5</sup>                      | 1.30 x 10 <sup>7</sup>                   | 9.90 x 10 <sup>6</sup>                | 1.05 x 10 <sup>7</sup>                      | 1.54 x 10 <sup>7</sup>                       | 1.63 x 10 <sup>7</sup>                   | 1.18 x 10 <sup>7</sup>                  | 2.60 x 10 <sup>7</sup> | 1.39 x 10 <sup>7</sup> |
|                                    | -                                       | 1.18 x 10 <sup>7</sup>                      | 1.05 x 10 <sup>7</sup>                   | 1.22 x 10 <sup>7</sup>                | -                                           | 1.69 x 10 <sup>7</sup>                       | 1.80 x 10 <sup>7</sup>                   | 1.82 x 10 <sup>7</sup>                  | 5.10 x 10 <sup>7</sup> | 1.42 x 10 <sup>7</sup> |
|                                    | -                                       | 1.28 x 10 <sup>7</sup>                      | 1.12 x 10 <sup>7</sup>                   | 1.36 x 10 <sup>7</sup>                | -                                           | 1.72 x 10 <sup>7</sup>                       | 1.67E x 10 <sup>7</sup>                  | 1.79 x 10 <sup>7</sup>                  | 6.20 x 10 <sup>7</sup> | 1.39 x 10 <sup>7</sup> |
| <b>Mean</b>                        | 1.73 x 10 <sup>7</sup>                  | 7.33 x 10 <sup>6</sup>                      | 1.10 x 10 <sup>7</sup>                   | 1.20 x 10 <sup>7</sup>                | 1.28 x 10 <sup>7</sup>                      | 1.50 x 10 <sup>7</sup>                       | 1.83 x 10 <sup>7</sup>                   | 1.52 x 10 <sup>7</sup>                  | 3.72 x 10 <sup>7</sup> | 1.36 x 10 <sup>7</sup> |
| <b>SD</b>                          | 1.78 x 10 <sup>6</sup>                  | 5.53 x 10 <sup>6</sup>                      | 1.12 x 10 <sup>6</sup>                   | 2.05 x 10 <sup>6</sup>                | 2.05 x 10 <sup>6</sup>                      | 1.82 x 10 <sup>6</sup>                       | 2.88 x 10 <sup>6</sup>                   | 2.50 x 10 <sup>6</sup>                  | 1.55 x 10 <sup>6</sup> | 1.81 x 10 <sup>6</sup> |
| <b>%CV</b>                         | 10.31                                   | 75.45                                       | 10.16                                    | 17.15                                 | 15.96                                       | 12.08                                        | 15.68                                    | 16.49                                   | 41.66                  | 13.31                  |

The table shows mean and standard deviation (SD) log<sub>10</sub> CFU of biofilms treated by fractions obtained from lyophilized and dried extracts in a sample concentrator (methodology 1). Data from 1 experimental occasion. Growth control (no treatment) is represented as Sm for *S. mutans* and V for vehicle control (the concentration in each well being 5.26% EtOH and 0.94% DMSO).

**Table S2.** Activity against initial biofilm formation (24 h) of fractions of *C. sylvestris* against *S. mutans*

|                                    | ARA<br><i>lingua</i><br>leaves<br>(Hex) | ARA<br><i>lingua</i><br>leaves<br>(AcOEt) | ARA<br><i>lingua</i><br>leaves<br>(EtOH) | ARA<br><i>lingua</i><br>fruits<br>(Hex) | ARA<br><i>sylvestris</i><br>leaves<br>(Hex) | ARA<br><i>sylvestris</i><br>leaves<br>(EtOH) | ARA<br>intermedi<br>ate leaves<br>(Hex) | ARA<br>intermedi<br>ate leaves<br>(EtOH) | BRA<br><i>lingua</i><br>leaves<br>(Hex) | V                       | Sm                     |
|------------------------------------|-----------------------------------------|-------------------------------------------|------------------------------------------|-----------------------------------------|---------------------------------------------|----------------------------------------------|-----------------------------------------|------------------------------------------|-----------------------------------------|-------------------------|------------------------|
| <b>Log<sub>10</sub><br/>CFU/mL</b> | 7.38                                    | 7.19                                      | 6.49                                     | 7.2                                     | 6.75                                        | 6.91                                         | 6.62                                    | 5.36                                     | 6.94                                    | 5.3                     | 5.3                    |
|                                    | 7.3                                     | 7.21                                      | 6.52                                     | 7.23                                    | 6.79                                        | 6.94                                         | 6.57                                    | 5.2                                      | 6.9                                     | 5.6                     | 5.48                   |
|                                    | 7.32                                    | 7.05                                      | 6.49                                     | 7.23                                    | 6.41                                        | 6.87                                         | 6.7                                     | 5.62                                     | 6.89                                    | 7.13                    | 7                      |
|                                    | 7.49                                    | 7.08                                      | 6.56                                     | 7.11                                    | 6.52                                        | 6.92                                         | 6.64                                    | 5.64                                     | 6.96                                    | 7.03                    | 7.11                   |
|                                    | 7.36                                    | 6.93                                      | 6.41                                     | 7.23                                    | 7.09                                        | 6.3                                          | 6.68                                    | 6.79                                     | 6.98                                    | 7.12                    | 7.09                   |
|                                    | 7.38                                    | 6.89                                      | 6.32                                     | 7.08                                    | 7.27                                        | 6.34                                         | 6.69                                    | 6.81                                     | 6.92                                    | 7.09                    | 7.08                   |
| <b>Mean</b>                        | 7.37                                    | 7.06                                      | 6.47                                     | 7.18                                    | 6.8                                         | 6.71                                         | 6.65                                    | 5.9                                      | 6.93                                    | 6.54                    | 6.51                   |
| <b>SD</b>                          | 0.07                                    | 0.13                                      | 0.08                                     | 0.07                                    | 0.33                                        | 0.31                                         | 0.05                                    | 0.71                                     | 0.04                                    | 0.85                    | 0.87                   |
| <b>%CV</b>                         | 0.9                                     | 1.84                                      | 1.3                                      | 0.94                                    | 4.81                                        | 4.54                                         | 0.72                                    | 12.03                                    | 0.52                                    | 13.03                   | 13.36                  |
| <b>CFU/mL</b>                      | 2.40 × 10 <sup>7</sup>                  | 1.54 × 10 <sup>7</sup>                    | 3.10 × 10 <sup>6</sup>                   | 1.60 × 10 <sup>7</sup>                  | 5.60 × 10 <sup>6</sup>                      | 8.20 × 10 <sup>6</sup>                       | 4.20 × 10 <sup>6</sup>                  | 2.30 × 10 <sup>5</sup>                   | 8.80 × 10 <sup>6</sup>                  | 2.00 × 10 <sup>5</sup>  | 2.00 × 10 <sup>5</sup> |
|                                    | 2.00 × 10 <sup>7</sup>                  | 1.62 × 10 <sup>7</sup>                    | 3.30 × 10 <sup>6</sup>                   | 1.70 × 10 <sup>7</sup>                  | 6.10 × 10 <sup>6</sup>                      | 8.70 × 10 <sup>6</sup>                       | 3.70 × 10 <sup>6</sup>                  | 1.60 × 10 <sup>5</sup>                   | 7.90 × 10 <sup>6</sup>                  | 4.00 × 10 <sup>5</sup>  | 3.00 × 10 <sup>5</sup> |
|                                    | 2.10 × 10 <sup>7</sup>                  | 1.11 × 10 <sup>7</sup>                    | 3.10 × 10 <sup>6</sup>                   | 1.70 × 10 <sup>7</sup>                  | 2.60 × 10 <sup>6</sup>                      | 7.40 × 10 <sup>6</sup>                       | 5.00 × 10 <sup>6</sup>                  | 4.20 × 10 <sup>5</sup>                   | 7.70 × 10 <sup>6</sup>                  | 1.35 × 10 <sup>7</sup>  | 1.00 × 10 <sup>7</sup> |
|                                    | 3.10 × 10 <sup>7</sup>                  | 1.19 × 10 <sup>7</sup>                    | 3.60 × 10 <sup>6</sup>                   | 1.30 × 10 <sup>7</sup>                  | 3.30 × 10 <sup>6</sup>                      | 8.30 × 10 <sup>6</sup>                       | 4.40 × 10 <sup>6</sup>                  | 4.40 × 10 <sup>5</sup>                   | 9.20 × 10 <sup>6</sup>                  | 1.06 × 10 <sup>7</sup>  | 1.29 × 10 <sup>7</sup> |
|                                    | 2.30 × 10 <sup>7</sup>                  | 8.50 × 10 <sup>6</sup>                    | 2.60 × 10 <sup>6</sup>                   | 1.70 × 10 <sup>7</sup>                  | 1.23 × 10 <sup>7</sup>                      | 2.00 × 10 <sup>6</sup>                       | 4.80 × 10 <sup>6</sup>                  | 6.10 × 10 <sup>6</sup>                   | 9.50 × 10 <sup>6</sup>                  | 1.31 × 10 <sup>7</sup>  | 1.22 × 10 <sup>7</sup> |
|                                    | 2.40 × 10 <sup>7</sup>                  | 7.80 × 10 <sup>6</sup>                    | 2.10 × 10 <sup>6</sup>                   | 1.20 × 10 <sup>7</sup>                  | 1.86 × 10 <sup>7</sup>                      | 2.20 × 10 <sup>6</sup>                       | 4.90 × 10 <sup>6</sup>                  | 6.40 × 10 <sup>6</sup>                   | 8.40 × 10 <sup>6</sup>                  | 1.24E × 10 <sup>7</sup> | 1.19 × 10 <sup>7</sup> |
| <b>Mean</b>                        | 2.38 × 10 <sup>7</sup>                  | 1.18 × 10 <sup>7</sup>                    | 2.97 × 10 <sup>6</sup>                   | 1.53 × 10 <sup>7</sup>                  | 8.08 × 10 <sup>6</sup>                      | 6.13 × 10 <sup>6</sup>                       | 4.50 × 10 <sup>6</sup>                  | 2.29 × 10 <sup>6</sup>                   | 8.58 × 10 <sup>6</sup>                  | 9.61 × 10 <sup>6</sup>  | 7.57 × 10 <sup>6</sup> |
| <b>SD</b>                          | 3.87 × 10 <sup>6</sup>                  | 3.46 × 10 <sup>6</sup>                    | 5.35 × 10 <sup>5</sup>                   | 2.25 × 10 <sup>6</sup>                  | 6.19 × 10 <sup>6</sup>                      | 3.15 × 10 <sup>6</sup>                       | 4.76 × 10 <sup>5</sup>                  | 3.07 × 10 <sup>6</sup>                   | 7.14 × 10 <sup>5</sup>                  | 5.81 × 10 <sup>6</sup>  | 5.66 × 10 <sup>6</sup> |
| <b>%CV</b>                         | 16.23                                   | 29.24                                     | 18.05                                    | 14.68                                   | 76.55                                       | 51.41                                        | 10.59                                   | 133.94                                   | 8.32                                    | 60.52                   | 74.81                  |

The table shows mean and standard deviation (SD) log<sub>10</sub> CFU of biofilms treated by fractions obtained from dry extracts in the sample concentrator and dried in a fume hood (methodology 2). Data from 1 experimental occasion. Growth control (no treatment) is represented as Sm for *S. mutans* and V for vehicle control (the concentration in each well being 5.26% EtOH and 0.94% DMSO).

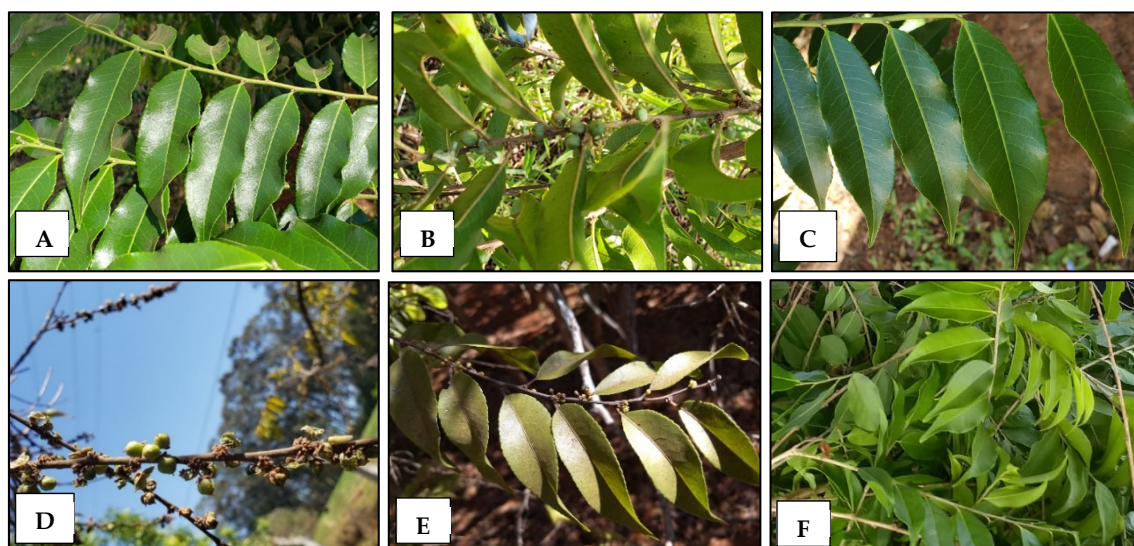

**Figure S1.** Samples of leaves and fruits of specimens collected from *C. sylvestris* showing anatomical details. Leaf and fruit specimens from specimens collected from *C. sylvestris*. **A.** Sample of ARA/SP var. *sylvestris*. **B.** Sample of ARA/SP var. *lingua*. **C.** Sample of ARA/SP var. intermediate. **D.** Sample of fruits from ARA/SP var. *lingua*. **E.** Sample of BRA/DF var. *lingua*. **F.** Sample of PRE/SP var. *sylvestris*.  
Source: Author's personal archive.

**Table S3.** pH values of crude extracts of *C. sylvestris*

| Sample Code | Variety           | Plant part | Work Solution Concentration | pH value when diluted (1:1) in 2.5M phosphate buffer pH 6.2 | pH value when diluted (1:1) in 2.5M phosphate buffer pH 6.8 |
|-------------|-------------------|------------|-----------------------------|-------------------------------------------------------------|-------------------------------------------------------------|
| ARA/SP      | <i>lingua</i>     | leaves     | 12 mg/mL                    | 6.996                                                       | -                                                           |
| ARA/SP      | <i>lingua</i>     | fruits     | 12 mg/mL                    | 7.064                                                       | -                                                           |
| ARA/SP      | <i>sylvestris</i> | leaves     | 12 mg/mL                    | 6.852                                                       | 7.101                                                       |
| ARA/SP      | intermediate      | leaves     | 12 mg/mL                    | 6.527                                                       | 7.03                                                        |
| BRA/DF      | <i>lingua</i>     | leaves     | 12 mg/mL                    | 6.515                                                       | 7.076                                                       |
| PRE/SP      | <i>sylvestris</i> | leaves     | 18 mg/mL                    | 6.882                                                       | -                                                           |
| PRE/SP      | <i>sylvestris</i> | twigs      | 18 mg/mL                    | 6.945                                                       | -                                                           |
| Vehicle     |                   | -          |                             | 7.039                                                       | -                                                           |

To check the pH of each extract and vehicle (no microorganism) the stock solutions were diluted 1:1 in PBS (2.5 mM phosphate buffer, pH 6.2) and then added to glass tubes containing TY + 1 % sucrose (concentration of extracts 500 µg/mL). The pH was measured using a digital pH meter. Crude extracts with 0.2 pH difference *vs.* vehicle (in blue) were adjusted by diluting in PBS (2.5 mM phosphate buffer) pH 6.8.

**Table S4.** Treatment agents used and their respective incubation were different based on the survival curve

|                                                                                                                                                 | Volume (μL) |           |                  |                     |           |             |           |                   |         |
|-------------------------------------------------------------------------------------------------------------------------------------------------|-------------|-----------|------------------|---------------------|-----------|-------------|-----------|-------------------|---------|
|                                                                                                                                                 | CHX         | C135      | AcOEt_<br>BRA/DF | <i>tt</i> -farnesol | CsF       | 1771        | J10595    | Fluoride<br>(NaF) | V       |
| Compound concentration                                                                                                                          | 0.12%       | 250 μg/mL | 250 μg/mL        | 125 μg/mL           | 125 μg/mL | 7.812 μg/mL | 500 μg/mL | 250ppm            | 0 (V)   |
| Stock volume 2 mg/mL 1771. 1 mg/mL<br>CsF. 2 mg/mL AcOEt and 15 mg/mL<br>others in 84.15% EtOH + 15% DMSO.<br>Sodium fluoride 5000 ppm. CHX 20% | 9.00        | 25.05     | 187.49           | 12.53               | 187.49    | 5.85        | 50.03     | 75.00             | 0.00    |
| Vehicle volume (V) - 42.075% EtOH +<br>7.5% DMSO (μL) + 50% phosphate<br>buffer pH 6                                                            | 187.49      | 137.39    | 0.00             | 162.42              | 0.00      | 175.79      | 87.43     | 187.49            | 187.49  |
| Culture medium volume (μL)                                                                                                                      | 1303.51     | 1337.56   | 1312.51          | 1325.06             | 1312.51   | 1318.36     | 1362.54   | 1237.51           | 1312.51 |
| Total volume per tube                                                                                                                           | 1500        | 1500      | 1500             | 1500                | 1500      | 1500        | 1500      | 1500              | 1500    |
| incubation time                                                                                                                                 | 10 min      | 10 min    | 1 h              | 1 h                 | 4 h       | 6 h         | 6 h       | 6 h               | -&      |

EtOH: Ethanol; DMSO: dimethylsulfoxide; CHX: chlorhexidine; CsF: Caseargrewiin F. & There was the vehicle control for each incubation time with specific compounds.

**Table S5.** Cell viability reduction (log<sub>10</sub> CFU/mL) of *S. mutans* cultures

|               | Inoculum                | CHX 0.12%              | C135<br>250 µg/mL      | V<br>10 min            | AcOEt_BRA/<br>DF 250<br>µg/mL | <i>tt</i> - farnesol<br>125 µg/mL | V<br>1 h               | CsF<br>125 µg/mL       | V<br>4 h               | NaF<br>250 ppm         | Compound<br>1771<br>7.812 µg/mL | Myracetin<br>(J105951)<br>500 µg/mL | V<br>6 h               |
|---------------|-------------------------|------------------------|------------------------|------------------------|-------------------------------|-----------------------------------|------------------------|------------------------|------------------------|------------------------|---------------------------------|-------------------------------------|------------------------|
| <b>Log10</b>  | 9.45                    | 5.83                   | 6.18                   | 9.11                   | 7.56                          | 6.87                              | 9.08                   | 7.45                   | 8.29                   | 8.91                   | 8.22                            | 6.94                                | 8.33                   |
| <b>CFU/mL</b> | 9.41                    | 5.98                   | 6.31                   | 9.18                   | 7.48                          | 6.83                              | 9.12                   | 7.39                   | 8.34                   | 8.86                   | 8.21                            | 7.09                                | 8.29                   |
| <b>Mean</b>   | 9.43                    | 5.91                   | 6.25                   | 9.14                   | 7.52                          | 6.85                              | 9.1                    | 7.42                   | 8.32                   | 8.89                   | 8.22                            | 7.02                                | 8.31                   |
| <b>SD</b>     | 0.03                    | 0.1                    | 0.09                   | 0.05                   | 0.06                          | 0.03                              | 0.03                   | 0.04                   | 0.03                   | 0.03                   | 0                               | 0.1                                 | 0.03                   |
| <b>CFU/mL</b> | 2.80 × 10 <sup>9</sup>  | 6.80 × 10 <sup>5</sup> | 1.52 × 10 <sup>6</sup> | 1.28 × 10 <sup>9</sup> | 3.60 × 10 <sup>7</sup>        | 7.40 × 10 <sup>6</sup>            | 1.21 × 10 <sup>9</sup> | 2.80 × 10 <sup>7</sup> | 1.97 × 10 <sup>8</sup> | 8.10 × 10 <sup>8</sup> | 1.65 × 10 <sup>8</sup>          | 8.80 × 10 <sup>6</sup>              | 2.12 × 10 <sup>8</sup> |
|               | 2.56 × 10 <sup>9</sup>  | 9.50 × 10 <sup>5</sup> | 2.05 × 10 <sup>6</sup> | 1.50 × 10 <sup>9</sup> | 3.00 × 10 <sup>7</sup>        | 6.80 × 10 <sup>6</sup>            | 1.32 × 10 <sup>9</sup> | 2.46 × 10 <sup>7</sup> | 2.18 × 10 <sup>8</sup> | 7.30 × 10 <sup>8</sup> | 1.64 × 10 <sup>8</sup>          | 1.22 × 10 <sup>7</sup>              | 1.93 × 10 <sup>8</sup> |
| <b>Mean</b>   | 2.68 × 10 <sup>9</sup>  | 8.15 × 10 <sup>5</sup> | 1.79 × 10 <sup>6</sup> | 1.39 × 10 <sup>9</sup> | 3.30 × 10 <sup>7</sup>        | 7.10 × 10 <sup>6</sup>            | 1.27 × 10 <sup>9</sup> | 2.63 × 10 <sup>7</sup> | 2.08 × 10 <sup>8</sup> | 7.70 × 10 <sup>8</sup> | 1.65 × 10 <sup>8</sup>          | 1.05 × 10 <sup>7</sup>              | 2.03 × 10 <sup>8</sup> |
| <b>SD</b>     | 1.70E × 10 <sup>8</sup> | 1.91 × 10 <sup>5</sup> | 3.75 × 10 <sup>5</sup> | 1.56 × 10 <sup>8</sup> | 4.24 × 10 <sup>6</sup>        | 4.24 × 10 <sup>7</sup>            | 7.78 × 10 <sup>7</sup> | 2.40 × 10 <sup>6</sup> | 1.48 × 10 <sup>7</sup> | 5.66 × 10 <sup>7</sup> | 7.07 × 10 <sup>5</sup>          | 2.40 × 10 <sup>6</sup>              | 1.34 × 10 <sup>8</sup> |

*S. mutans* cultures were treated by different agents and the respective exposure times to treatments. The table shows mean and standard deviation of data from 1 experimental occasion. Vehicle control is represented as V for each incubation time. SD denotes standard deviation.

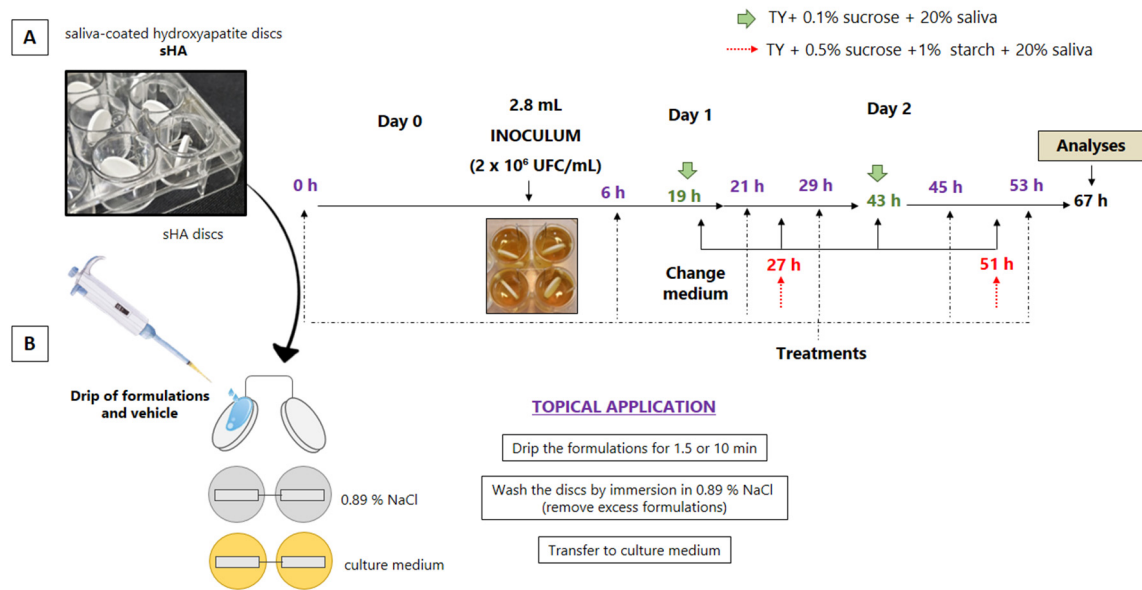

**Figure S2.** Experimental design for topical treatment regimen in biofilms formed on sHA discs. **A.** The sHA discs were treated at 0 (salivary pellicle before incubation with *S. mutans*) and after 6, 21, 29, 45, and 53 h of biofilm development. At 67 h of development, the biofilms were processed for analysis. The pH of the spent medium was evaluated at 19, 27, 43, 46, 51, and 67 h. **B.** Illustration of topical treatment of salivary film-coated hydroxyapatite discs. Topical treatment consisted of dripping the formulations (or vehicle control).
